# Supplementary material
Source: PubMed Central journal article supplement (PMC4131896)
Supplement: bi500768c_si_001.pdf [file bi500768c_si_001.pdf]

## Supporting Information

### Fluctuations of an Exposed $\pi$ -Helix Involved in Lipoyxygenase Substrate Recognition.

Miles D. Bradshaw and Betty J. Gaffney.

Department of Biological Science, Florida State University, Tallahassee FL 32306.

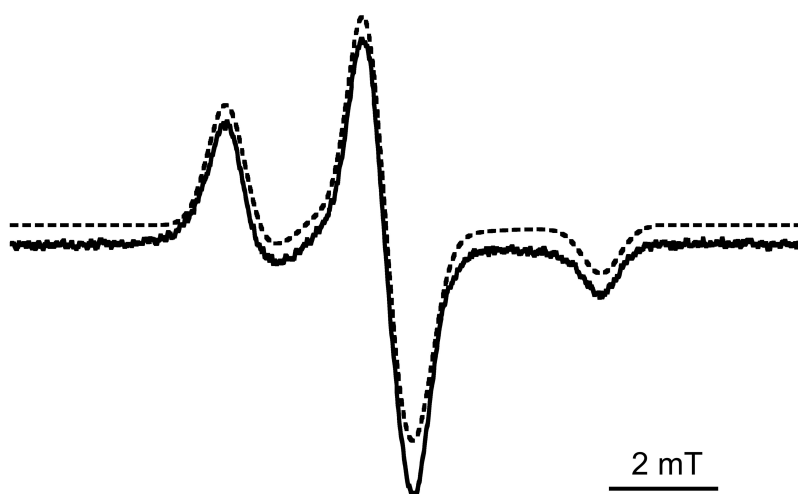

**Figure S1.** CW-EPR spectrum of Q267R<sub>1</sub> SBL1 at 60K (*solid*) with simulation (*dashed*). Spectrum recorded at 9.404 GHz microwave frequency, 0.2  $\mu$ W microwave power, 2 Gauss modulation amplitude, with 100 kHz modulation frequency. Spectrum was simulated with the program pepper of the EasySpin software package<sup>1</sup> (version 4.5.5) using a Gaussian line shape with an 8.4 G (FWHH) line width. The spectrum was simulated using the following g tensor values:  $g_{xx}$ : 2.0084,  $g_{yy}$ : 2.0061,  $g_{zz}$ : 2.0020; and the following A tensor values:  $A_{xx}$ : 3.5 G,  $A_{yy}$ : 5.5 G,  $A_{zz}$ : 35.4 G.

**Table S1: Comparison of Steady State Kinetic Constants of Spin-Labeled Mutants of SBL1.**

| Residue                         | $k_{\text{cat}}$ ( $\text{s}^{-1}$ ) | Km ( $\mu\text{M}$ ) |
|---------------------------------|--------------------------------------|----------------------|
| WT <sup>a</sup>                 | 234                                  | 16                   |
| NoCys <sup>a</sup>              | 215, 178 <sup>b</sup>                | 20, 18 <sup>b</sup>  |
| I257R <sub>1</sub>              | 250 ± 9 <sup>c</sup>                 | 20 ± 4               |
| T259R <sub>1</sub>              | 174 ± 5                              | 7.5 ± 0.6            |
| K260R <sub>1</sub>              | 149 ± 4                              | 6.5 ± 0.5            |
| S261R <sub>1</sub>              | 186 ± 8                              | 8.0 ± 0.9            |
| L262R <sub>1</sub>              | 173 ± 6                              | 15 ± 1               |
| S263R <sup>d</sup>              | 203 ± 4                              | 26 ± 1               |
| Q264R <sub>1</sub>              | 126 ± 2                              | 13.3 ± 0.5           |
| I265R <sub>1</sub>              | 218 ± 5                              | 8.3 ± 0.5            |
| Q267R <sub>1</sub>              | 185 ± 4                              | 12.4 ± 0.6           |
| F270R <sub>1</sub> <sup>a</sup> | 96                                   | 13                   |
| F274R <sub>1</sub>              | 230 ± 4                              | 4.9 ± 0.3            |

<sup>a</sup>Kinetic constants of WT, cysteine-free (NoCys), and F270R<sub>1</sub> SBL1 from Gaffney *et al.* 2012. <sup>b</sup>Kinetic constants for NoCys determined by detergent-free assay shown for comparison with S263R<sub>1</sub> kinetic constants. <sup>c</sup>Uncertainties of the fit to the Michaelis-Menten equation are reported as mean-squared error. <sup>d</sup>S263R<sub>1</sub> displayed non steady state kinetics in the presence of the detergent TWEEN-20 and was determined by detergent-free assay.

## References:

---

(1) Stoll, S., Schweiger, A. (2006). EasySpin, a comprehensive software package for spectral simulation and analysis in EPR. *J. Magn. Reson.* 178, 42-55.
